# Supplementary material for: An Adaptation To Life In Acid Through A Novel Mevalonate Pathway
Source: PubMed Central journal article supplement (PMC5177888; doi:10.1038/srep39737), 2016-12-22
Supplement: srep39737-s1.pdf [file srep39737-s1.pdf]

# An Adaptation To Life In Acid Through A Novel Mevalonate Pathway.

Jeffrey M. Vinokur,<sup>+,1</sup> Matthew C. Cummins,<sup>+,1</sup> Tyler P. Korman,<sup>1</sup> James U. Bowie<sup>1,\*</sup>

## SUPPLEMENTARY MATERIALS

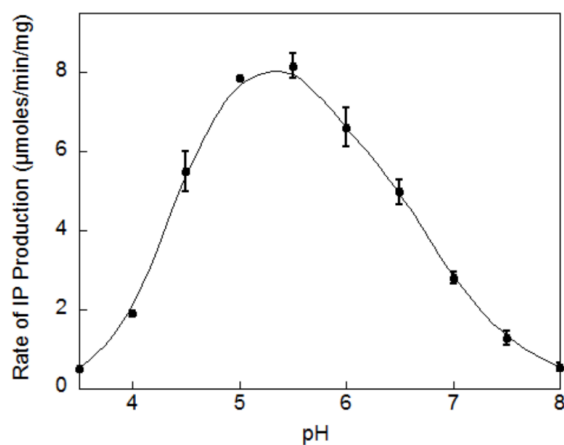

**Figure S1. Optimum pH of *P. torridus* MBD.** *P. torridus* MBD was assayed from pH 3.5 – 8 in 0.5 unit increments at 60°C.

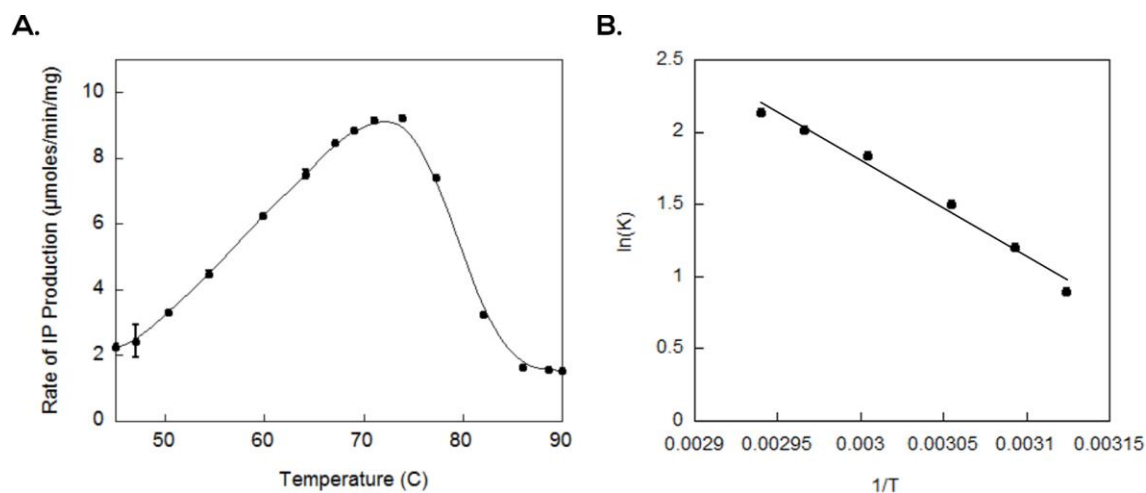

**Figure S2. Temperature dependence of *P. torridus* MBD activity.** (A.) *P. torridus* MBD was assayed from 45-90°C with the pH held constant at 5.5. (B.) An Arrhenius plot was generated from the data points from 47-67°C by plotting ln(K) vs. 1/T.

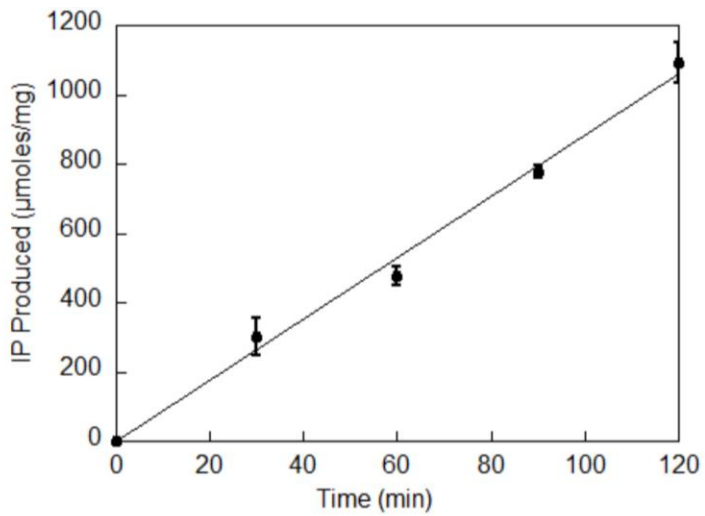

**Figure S3. Time course of IP production by *P. torridus* MBD.** *P. torridus* MBD was incubated with mevalonate 3,5-bisphosphate at 60°C and pH 5.5. The reaction was stopped at 0, 30, 60, 90, and 120 min. The IP produced by MBD was quantified via our GC-FID assay.
